# Supplementary material for: Assessing the landscape of clinical trials involving bioprinting: a scoping review
Source: Research Square preprint supplement (doi:10.21203/rs.3.rs-4919310/v1), 2024-09-16
Supplement: Supplementary file 1 [file 11f0d03dfe5184ab66ef300b.xlsx]

## Sheet: Sheet1
GENERAL STUDY CHARACTERISTICS																BIOPRINTING-RELATED ITEMS					CLINICAL TRIAL DESIGN
Trial ID/DOI	Public title	Official title	URL	Registry	Responsible party	Date first posted	Date last updated	Year posted	Actual start date	Estimated completion date	Estimated completion year	Country (conducted by)	Country (conducted where)	Recruitment status	Status of results	Bioprinting application	Condition/s	Tissue type	Cell type/source	Bioink	Study type	Phase	Description	Objectives	Types of intervention	Test group intervention	Inclusion criteria	Exclusion criteria	Primary outcome measures	Secondary outcome measures
ChiCTR-IOR-16009658	A precision medicine-based clinical study of screening targeted drug combined with chemotherapy for the treatment of primary advanced ovarian cancer	A precision medicine-based clinical study of screening targeted drug combined with chemotherapy for the treatment of primary advanced ovarian cancer	http://www.chictr.org.cn/showproj.aspx?proj=16370	ChiCTR	Department of Gynecology and Obstetrics, Renji Hospital Affiliated to Shanghai JiaoTong University School of Medicine	2016-10-27	2016-10-27	2016	01-Nov-16	2019-12-31	2019	China	China	Not yet recruiting	None	Model	Ovarian Cancer	Tumor	Autologous tumor cells	Not specified	Interventional	N/A	There are significant individual differences in chemotherapy sensitivity and clinical prognosis among patients with ovarian cancer. This project will be based on the high-throughput 3D tumor cell culture platform and 3D tumor cell drug screening model that we have innovatively established, combined with the quantitative analysis of Chou-Talalay combination index drug combination, to conduct targe…	There were significant individual differences in the chemotherapy sensitivity and clinical outcome in patients with ovarian cancer. This clinical study aimed to verify the clinical value of targeted drug (bevacizumab) combined with chemotherapy drugs(carboplatin plus paclitaxel) and health economics of primary ovarian cancer as first-line chemotherapy regimen based on the high-throughput 3D tumor…	Group: control group Sample size: 240. Interventions: Carboplatin + Paclitaxel. Group: test group Sample size: 80 Interventions: Bevacizumab + carboplatin + paclitaxel Group: Test group A Sample size: 40 Interventions: Drug dosage combination plan formulated based on 3D bioprinting platform and drug combination effect analysis Group: Test group B Sample size: 40 Interventions: According to the re…	Drug dosage combination plan formulated based on 3D bioprinting platform and drug combination effect analysis	1. Female over 18 years of age; 2. Patients should have received optimal cytoreductive surgery with residual tumor <=1cm; histologically-confirmed epithelial ovarian; 3. Patients should not have received any drug treatment before primary surgery; 4. ECOG Scale of Performance Status 0-2; 5. Laboratory tests within 7 days after being admitted to hospital: White blood cell count >1,500/mm3, Platelet…	1) Non-epithelial tumors or borderline tumors; 2) Patients without recurrence who underwent secondary laparotomy or debulking surgery after chemotherapy as planned; 3) Patients with a second tumor or other tumors that have undergone surgical treatment, and their Patients whose treatment interferes with the surgical treatment of recurrent ovarian cancer or affects the prognosis of this surgical tr…	-overall survival time -progression-free survival -objective response rate	Not specified
NCT03832153	Pan-Cardio-Genetics Clot Assessment in Acute Coronary Syndromes	Pan-Cardio-Genetics Clot Assessment in Acute Coronary Syndromes	https://clinicaltrials.gov/show/NCT03832153	ClinicalTrials.gov	Aristotle University Of Thessaloniki	2019-02-06	2022-03-03	2019	2019-01-20	2022-03-30	2022	Greece	Greece	Withdrawn	None	Model	STEMI (ST-elevation Myocardial Infarction). Thrombi, MicroRNA	Not specified	Not specified	Not specified	Observational	N/A	Acute myocardial infarction with ST elevation (STEMI) is one of the leading causes of mortality. Although the presence of thrombus in STEMI patients has been linked to adverse outcomes, routine thrombus aspiration has not been proven effective. A potential explanation could be that patients with STEMI should be risk-stratified. Thus, a more personalized approach in treating these patients is stre…	See description	Procedure: thrombus aspiration Thrombus aspiration will be performed by experienced interventional cardiologists according to standard practices, as previously described. The intracoronary blood samples will be collected as well during the same procedure and- along with peripheral blood samples- they will be analyzed for the presence of specific miRNAs. The aspirated thrombi will be preserved in …	Thrombus aspiration	-Patients with symptoms of myocardial ischemia lasting for more than 30 minutes -Definite ECG changes indicating STEMI -Patients undergoing primary PCI within 12 hours from symptom onset -Possibility to perform thrombus aspiration Written informed consent	-Treatment with fibrinolytic therapy for qualifying index STEMI event -Patients with known intolerance to aspirin, ticagrelor or heparin -Patients with active internal bleeding -Patients with a recent history of intracranial hemorrhage	Fold changes of differentially-expressed microRNA from peripheral blood from patients suffering from STEMI (measured in log2 scale) [Time Frame: 12 months] The expression profiles of the total number of microRNAs that exist in the peripheral blood of patients suffering from STEMI will be analyzed using Next Generation Sequencing (NGS). Blood samples collected from the patients will be used to ext…	Association between fold changes of microRNA expression and post-procedural Thrombolysis in Myocardial Infarction (TIMI) flow [Time Frame: 12 months] Fold changes of differentially-expressed microRNAs (measured in log2 scale as described above) will be correlated to post-procedural TIMI flow (classified as previously described: TIMI flow 0,1,2 or 3). Association between fold changes of microRNA e…
NCT03890614	Novel 3D Hematological Malignancy Organoid to Study Disease Biology and Chemosensitivity (Organoid)	Novel 3D Hematological Malignancy Organoid Platform to Study Disease Biology and Perform Chemosensitivity Assays for Patient-Specific Care	https://clinicaltrials.gov/study/NCT03890614	ClinicalTrials.gov	Wake Forest University Health Sciences	2019-03-18	2024-03-15	2019	2019-05-16	2025-02-01	2025	USA	USA	Recruiting	None	Model	Hematologic Malignancy	Tumor (organoid)	Autologous tumor and stromal cells	Hyaluronic acid and gelatin-based hydrogel	Observational	N/A	Optimize the novel 3D organoid technique already used to recreate myeloma tumors in the Regenerative Medicine laboratory. Optimize cell viability of myeloma organoids to extend available time in culture by screening cell culture media cytokines and 3D extracellular matrix composition (current environment is able to maintain cells alive for up to 5-7 days to allow testing). Evaluate myeloma tumor …	The objective of this project is to compare chemosensitivity between chemotherapy combinations in bone marrow aspirates using 3D organoid models. The investigators overarching hypothesis is that 3D organoids are ideal to test chemosensitivity in real time, to provide personalized medicine and guidance in the setting of relapsed hematologic malignancy and potentially other cancers.	Other: Ancillary-Correlative - Creation of three-dimensional myeloma organoids using marrow aspirates Bone marrow aspirates will be collected from participants with hematologic malignancy being evaluated for relapsed disease to create three-dimensional constructs using a three-dimensional bioprinting methodology for automated organoid biofabrication.	Creation of three-dimensional myeloma organoids using marrow aspirates	-Patients with suspected or confirmed hematologic malignancy undergoing a bone marrow biopsy as part of their care. -The ability to understand and willingness to sign an IRB approved informed consent document.		Proportion of Live/Dead Myeloma Cells Using Bioprinting Technology [Time Frame: Up to 5 days] Bone marrow aspirates (around 3-7 ml) will be collected from patients with hematologic malignancy being evaluated for relapsed disease. The samples will be used to create 3D organoid constructs using a 3D bioprinting technology for automated organoid biofabrication using hyaluronic acid and gelatin-based…	Number of Reduced Hematologic Malignant Myeloma Cells [Time Frame: Up to 3 days] After 24 hours of incubation, chemotherapy agents will be added at prepared concentrations that fall within the prescribed therapeutic ranges. A maximum of 15 combinations for each donor will be allowed for testing after which the efficacy of the treatments will be assessed qualitatively (live/dead straining) and qua…
NCT04755907	3D Bioprinted Models for Predicting Chemotherapy Response in Colorectal Cancer With/Without Liver Metastases	Validation of the Three-dimensional Bioprinted Tumor Models as a Predictive Method of the Response to Chemotherapy for Colorectal Cancer With or Without Liver Metastases	https://clinicaltrials.gov/study/NCT04755907	ClinicalTrials.gov	Peking Union Medical College Hospital	2021-02-16	2022-07-07	2021	2021-03-01	2023-12-31	2023	China	China	Recruiting	None	Model	Colorectal Cancer, Colorectal Cancer Liver Metastasis	Tumor (organoid)	Autologous tumor tissue	Not specified	Observational	N/A	The therapeutic regimens of adjuvant and neoadjuvant chemotherapy for colorectal cancer (CRC) remain largely relied on clinical experience, and thus preclinical models are needed to guide individualized medicine. The investigators are going to establish 3D bioprinted CRC models and organoids from surgically resected tumor tissues of CRC patients with or without liver metastases. In vitro 3D model…	N/A	Procedure: surgical resection -Surgical resection will be performed for locoregional lesions or liver metastases. Other: adjuvant chemotherapy -Regimens of adjuvant chemotherapy are directed by clinical guidance and experience. Other: neoadjuvant therapy -Regimens of neoadjuvant chemotherapy are directed by clinical guidance and experience.	Surgical resection, adjuvant and neoadjuvant chemotherapy	-More than 18 years old -Diagnosed as colorectal cancer with or without liver metastases before -Pathologically proven colorectal cancer after surgery	-Medical history with other malignancies or serious diseases -Disable to sign the informed consent independently	Response of 3D tumor models/organoids to the same chemotherapy drugs as the corresponding patients.	Response of the colorectal cancer patients to neoadjuvant chemotherapy. Other Outcome Measures: Response of the colorectal cancer patients to adjuvant chemotherapy.
NCT04925323	A DERMO-EPIDERMAL AUTOLOGOUS SKIN SUBSTITUTE FOR FURTHER THERAPEUTIC USE (BIOPSKIN)	VALIDATION OF A GMP-COMPLIANT BIOPRINTING PROCESS FOR MANUFACTURING A DERMO-EPIDERMAL AUTOLOGOUS SKIN SUBSTITUTE FOR FURTHER THERAPEUTIC USE	https://clinicaltrials.gov/show/NCT04925323	ClinicalTrials.gov	Assistance Publique Hopitaux De Marseille	2021-06-14	2021-06-14	2021	2021-01-12	2023-10-01	2023	France	France	Recruiting	None	Model	Plastic Surgeries	Skin	Autologous keratinocytes, fibroblasts	Not specified	Interventional	N/A	Innovative technologies in the emerging field of regenerative medicine might allow an improvement in the treatment of deep complex wounds leading to faster and better wound healing. Among them, the bioprinting technology, consisting in "printing human cells and biomaterials" to create a "dermo-epidermal substitute" that mimics an alternative of the physiological skin is the most promising alterna…		Biological: Blood Samples; Biological surgical tissue samples unused surgical tissue removed during plastic surgeries.	Blood Samples, unused surgical tissue removed during plastic surgeries	-Adult adult males or females -Members of a social security scheme. -No contraindications to general anesthesia -Relevant to a plastic or repair surgery indication generating surgical waste.	-Pregnant and/or nursing women -Persons deprived of liberty -Major under guardianship -Persons unable to read the backgrounder.	bioprinted dermo epidermal substitute sterility assessment [ Time Frame: 24 MONTHS ] Culture media from dermo-epidermal bioprinted substitutes were sampled in Bactec culture bottles (Peds Plus Aerobic/F and Plus Anaerobic/F culture vials, containing each 40 mL of medium). The Bactec method (Becton Dickinson, Sparks, MD, USA) uses a computer-controlled incubation/detection system. The media used c…	Not specified
ChiCTR2200066886	Clinical application of 3D bioprinted organoid drug screen in adjuvant chemotherapy of pancreatic cancer	Clinical application of 3D bioprinted organoid drug screen in adjuvant chemotherapy of pancreatic cancer	https://www.chictr.org.cn/showprojEN.html?proj=174815	ChiCTR	Peking Union Medical College Hospital, Chinese Academy of Medical Sciences	2022-12-20	2022-12-20	2022	2023-01-01	2025-12-31	2025	China	China	Not yet recruiting	None	Model	Pancreatic Cancer	Tumor (organoid)	Autologous tumor tissue	Not specified	Interventional	2	Not provided	To explore if adjuvant chemotherapy regimen guided by organoid drug sensitivity test can improve prognosis of patients with pancreatic cancer.	Group：Experimental group Sample size：74 Intervention：Patients receive relatively sensitive chemotherapy regimen based on the results of organoid drug screening Group：Control group Sample size：74 Intervention：Chemotherapy regimens will be formulated by oncologists or pancreatic surgeons according to guidelines for pancreatic cancer and the patient's condition.	Patients receive relatively sensitive chemotherapy regimen based on the results of organoid drug screening	(1) Patients have good compliance, can understand the study process, and signed the written informed consent; (2) age ≥18 years old and ≤70 years old; (3) patients with a histopathological or cytological diagnosis of pancreatic ductal adenocarcinoma, or a clinical diagnosis of pancreatic ductal adenocarcinoma Of the patients; (4) ECOG≤1; (5) predicted survival time≥3 months; (6) expected radical …	(1) patients with other malignant tumors or received antitumor therapy in the past 5 years; (2) non-pancreatic ductal adenocarcinoma confirmed by postoperative pathology; (3) patients unable to receive chemotherapy due to postoperative complications or poor physical status; (4) patients of childbearing age who are pregnant or lactating or who refuse to use appropriate contraception during the cou…	One-year survival rate	-Disease-free survival -Overall survival
NCT05955092	Exploring the Application of 3D Bioprinting for Personalized Treatment in Pancreatic Ductal Adenocarcinoma	Exploring the Application of 3D Bioprinting Technology in Constructing Preclinical Models of Pancreatic Cancer for Drug Sensitivity Testing and Its Significance in Personalized Treatment	https://clinicaltrials.gov/study/NCT05955092	ClinicalTrials.gov	Peking Union Medical College Hospital	2023-07-21	2023-07-21	2023	2022-12-01	2024-09-30	2024	China	China	Recruiting	None	Model	Pancreatic Ductal Adenocarcinoma	Tumor	Autologous tumor tissue	Not specified	Observational	N/A	The goal of this observational study is to test the application value of 3D bioprinting technology in personalized treatment of pancreatic cancer.	The main questions it aims to answer are: Can 3D bioprinting technology be successfully applied to establish preclinical models of pancreatic cancer? Can 3D bioprinted preclinical models of pancreatic cancer be applied to personalized treatment of pancreatic cancer? Participants will have tumor tissue collected to extract primary tumor cells for the establishment of in vitro preclinical models, w…	Not specified	Not specified	-More than 18 years old -Diagnosed as colorectal cancer with or without liver metastases before -Pathologically proven colorectal cancer after surgery	-History of other malignancies or serious medical conditions -Inability to provide independent informed consent	Outcome Measure: Correlation of Drug Sensitivity in In Vitro Tumor Models with Clinical Response in Patients Measure Description: Evaluation of the efficacy of neoadjuvant therapy in clinical response using the internationally recognized Response Evaluation Criteria in Solid Tumors (RECIST) 1.1: Stable Disease (SD) and Partial Response (PR) are considered indicators of chemotherapy sensitivity (g…	Outcome Measure: Progression-free survival time (PFS) Measure Description: The time from the start of postoperative adjuvant therapy to recurrence or death. Time Frame: Up to 2 years.
NCT04399239	AuriNovo for Auricular Reconstruction	A Multicenter, Single Arm, Prospective, Open-Label, Staged Study of the Safety and Efficacy of the AuriNovo Construct for Auricular Reconstruction in Subjects With Unilateral Microtia	https://clinicaltrials.gov/ct2/show/record/NCT04399239	ClinicalTrials.gov	3DBio Therapeutics	2020-05-22	2023-05-24	2020	2021-08-09	2023-05-18	2023	USA	USA	Terminated	None	Implant	Microtia	Auricle	Autologous chondrocytes	Collagen-based hydrogel	Interventional	1/2A	AuriNovo provides a patient-specific, biological construct for use in the surgical reconstruction of the external ear in people born with microtia Grades II-IV. This Phase 1 / 2A study is being conducted to collect preliminary safety data on microtic ear reconstruction using AuriNovo, fine-tune technical, logistical, surgical, and post-surgical care aspects related to implantation, and to gather …	See description	Combination Product: AuriNovo AuriNovo is a patient-specific, biologically natural, supportive base for surgical reconstruction of the external ear (auricle) in people born with microtia Grades II-IV. The construct is a 3D-bioprinted collagen hydrogel scaffold encapsulating the patient's own auricular cartilage cells (chondrocytes). The construct is printed in a size and shape that matches the co…	Combination Product: AuriNovo	-Pediatric children 6-11, adolescents 12-16, or adults 17-25 years old -Born with unilateral microtia Grade II, III, or IV -No previous surgical procedure for auricular reconstruction -Have undergone an audiological assessment prior to enrollment and surgeon confirmation that study participation will not preclude future hearing correction options -Normal or near normal hairline position -Able to …	-Previous cochlear implant surgery -Patients with prior surgery in the temporal, parietal, or mastoid regions of the affected side that resulted in scarring that may affect the outcome of microtia reconstruction surgery. -Sensitivity to broad-spectrum aminoglycoside antibiotics containing any of the following: streptomycin, gentamycin tobramycin, amikacin, kanamycin, neomycin, or plazomicin. -Sen…	Safety through assessment of AEs [Time Frame: 3 months] Safety data will be collected on AE type, frequency and severity, treatment, and the time to resolution. Efficacy as measured through overall satisfaction scores [Time Frame: 3 months] Data will be collected to determine the suitability of the AACC to support reconstruction of the outer ear in microtia patients. The following will be used to…	Not specified
10.1177/15347346211045625	Management of Diabetic Foot Ulcer with MA–ECM (Minimally Manipulated Autologous Extracellular Matrix) Using 3D Bioprinting Technology – An Innovative Approach	Management of Diabetic Foot Ulcer with MA–ECM (Minimally Manipulated Autologous Extracellular Matrix) Using 3D Bioprinting Technology – An Innovative Approach	https://journals.sagepub.com/doi/10.1177/15347346211045625	Unregistered	ROKIT Healthcare, Inc.	2021	2021	2021	Not specified	2021	2021	South Korea	India	Completed	Published	Implant	Diabetic Foot Ulcer	Adipose	Autologous adipose tissue	Extracellular matrix	Interventional	Not specified	ABSTRACT: Chronic foot ulcers are the leading cause of prolonged hospitalization and loss of social participation in people with diabetes. Conventional management of diabetic foot ulcers (DFU) is associated with slow healing, high cost, and recurrent visits to the hospital. Currently, the application of autologous lipotransfer is more popular, as the regenerative and reparative effects of fat are…	FROM INTRODUCTION: The primary objective was to explore the efﬁcacy of MA-ECM in the process of healing the wound and the secondary outcome is to observe the decrease in the size of the wound. Here the authors present the data of the study conducted in our wound care center to explicate the efﬁcacy of the technique.	FROM MATERIALS AND METHODS (Study Design): The subjects in the test group were treated with MA-ECM one time by using the 3D bioprinting system and subjects in the control group received the standard wound care with Mepitel-one ® , (Molnlycke Health Care, Sweden) the dressing.	Treated with MA-ECM	-Subject is between 18 and 80 years of age. -Subject is diagnosed with Type I or Type II diabetes. -Foot ulcer duration of more than 8 weeks Foot ulcer located below the malleoli on plantar or dorsal surface of the foot and ulcer size is between 1 cm 2 and 5 cm2. -Ulcer is free of necrotic debris, exhibits no signs of clinical infection. -Ankle Brachial Index (ABI) – 0.7 to 1.3 Subject is able to…	-Ulcer is non-diabetic pathophysiology. -Gangrene or an active Charcot deformity -Subject is Human Immunodeﬁciency Virus (HIV) positive -Subjects with severe hepatic deﬁciencies -Subjects who are pregnant or breast-feeding -Subjects who have a clinically relevant history of alcohol or drugs abuse -Subjects who have a history of surgery for malignant tumor within the last ﬁve years -Subjects who a…	FROM INTRODUCTION: The primary objective was to explore the efﬁcacy of MA-ECM in the process of healing the wound FROM MATERIALS AND METHODS: All subjects were observed weekly to evaluate the wound size and epithelialization FROM RESULTS: There were no adverse events reported during the study. To evaluate the wound healing efﬁcacy of MA-ECM in the test and control group, foot ulcers at the toe, p…	FROM INTRODUCTION: ...the secondary outcome is to observe the decrease in the size of the wound.
ChiCTR2100049901	Study of the safety and efficacy of autologous stem cell 3D bioprinted blood vessels for vascular replacement in patients with peripheral limb arterial disease	Study of the safety and efficacy of autologous stem cell 3D bioprinted blood vessels for vascular replacement in patients with peripheral limb arterial disease	http://www.chictr.org.cn/showproj.aspx?proj=131612	ChiCTR	West China Hospital of Sichuan University	2021-08-04	2022-04-19	2021	2021-08-04	2038-08-04	2038	China	China	Recruiting	None	Implant	Peripheral Limb Arterial Disease	Blood vessel	Autologous stem cells	Not specified	Interventional	0	Primary purpose: to evaluate the safety and effectiveness of implanted autologous stem cell 3D bioprinted blood vessels; Secondary purpose: to evaluate blood vessel-related complications after peripheral limb arterial blood vessel replacement in subjects.	1.Main objective: To evaluate the safety and effectiveness of implanted autologous stem cell 3D bioprinted blood vessels; 2.Secondary objective: To evaluate the vascular-related complications after the subject's peripheral arterial blood vessel replacement.	group 1: Autologous stem cell 3D bioprinted blood vessel implantation;	Autologous stem cell 3D bioprinted blood vessel implantation	1. Male or female aged 18 to 65 years; 2. Clearly diagnosed as peripheral arterial disease (occlusive disease, traumatic disease, spontaneous injury disease), severe limb ischemia or potential rupture and bleeding, non-emergency surgical treatment; 3. Patients who are not suitable or unwilling to receive endovascular treatment; 4. The patient's diseased peripheral arteries have appropriate inflow…	1. Women who are breastfeeding or pregnant, or women or men who are planning to have children recently; 2. Life expectancy < 2 years; 3. Patients who are currently participating in other clinical studies; including those who plan to participate in other clinical trials within 3 years before the follow-up period; 4. Infectious vascular disease; 5. Active systemic infection was diagnosed within 14 …	Device success rate; Successful operation rate; Graft patency rate; Primary safety endpoint	In the 6th month after the operation, the primary patency rate of the blood vessel of the product; Secondary safety indicators
NCT06051747	Patient-Customized Bioprinting Technology for Practical Regeneration of the Respiratory Tract (Trachea)	Development of the Practical Usage Based Technology Using the Patient Customized Bioprinting Trachea for the Regeneration of Respiratory Tract (Trachea)	https://clinicaltrials.gov/study/NCT06051747	ClinicalTrials.gov	Ja Seong Bae, MD, phD, Seoul St. Mary's Hospital	2023-08-29	2023-09-25	2023	2023-07-14	2025-08-16	2025	South Korea	South Korea	Active, not recruiting	None	Implant	Thyroid Cancer	Trachea	Autologous nasal cavity stem cells, nasal septum cartilage cells	Hydrogel matrices	Interventional	1/2	Study Objective: This clinical study focuses on patients with thyroid or airway diseases necessitating partial or segmental organ resection. The objective is to evaluate the feasibility, efficacy, and safety of transplanting functional patient-specific bioprinted tracheal organs as an innovative regenerative approach. Patient Enrollment: Patients voluntarily participate and provide written consen…	This clinical trial aims to assess the effectiveness and safety of a novel approach utilizing biopolymers, hydrogels, mucous membranes, and cartilage tissue regeneration cells integrated into 3D bioprinting technology for the creation and implantation of patient-specific tracheal organs.	Procedure: Three-dimensional patient-specific bioprinting trachea implantation The intervention entails the creation of a 3D cell-printed tracheal organ, achieved through the fusion of biopolymer materials and the bioprinting (3D cell printing) technique. This process involves distribution of nasal cavity stem cells (hNTSCs) and nasal septum cartilage cells (hNCs) within hydrogel matrices, culmin…	Three-dimensional patient-specific bioprinting trachea implantation	Age Range: Individuals between 19 and 75 years of age are eligible for participation. Specific Medical Condition: Patients must meet the following criteria and have thyroid or airway diseases necessitating partial or segmental resection: Thyroid Cancer Patients: For patients with thyroid cancer, inclusion is based on TNM staging, specifically stage II or higher differentiated thyroid cancer patie…	Pregnancy and Lactation: Pregnant or lactating women are excluded from participation in the study. Prior Thyroid or Airway Surgery: Individuals who have undergone thyroid or airway peripheral surgery before undergoing screening are ineligible for participation. Persistent Inflammation: Patients with ongoing inflammation of the thyroid or surrounding tissues at the time of screening are excluded. …	airway lumen opening rate measured by curved laryngeal endoscopy 1 week, 2 weeks, 4 weeks, 24 weeks, 2 years crust formation degree measured by curved laryngeal endoscopy 1 week, 2 weeks, 4 weeks, 24 weeks, 2 years granuloma formation degree measured by curved laryngeal endoscopy 1 week, 2 weeks, 4 weeks, 24 weeks, 2 years degree of inflammation measured by curved laryngeal endoscopy 1 week, 2 we…	Airway State on CT airway patency by ratio compared to preoperative state 4 weeks white blood cell count (WBC) Serum inflammatory markers 4 weeks, 48 weeks, 2years differential white blood cell count (WBC Diff) Serum inflammatory markers 4 weeks, 48 weeks, 2years C-reactive protein (CRP) Serum inflammatory markers 4 weeks, 48 weeks, 2years erythrocyte sedimentation rate (ESR) Serum inflammatory m…
